# Supplementary material
Source: publisher site journal article supplement (https://edge.sagepub.com/system/files/jirard_appendix_c_guilty_plea_colloquy_agreement.pdf)
Supplement: Supplementary file 1 [file jirard_appendix_c_guilty_plea_colloquy_agreement.pdf]

  


Instructor Access | Online Resources


Skip to main content


Menu 


- Instructor Resources
- Student Resources
- Help
- Access Codes
- Create an account
 

- Login

  ## Access

  \*

  \*


  - New User?
  - Request new password
  - Create a new account

×

×

×

# Criminal Law and Procedure: A Courtroom Approach

First Edition

by Stephanie Jirard

## Instructor Access

Please login or create an account below.

**New Instructor Accounts - Account approval can take 48 hours so please allow for this time before attempting to login to this site.**

If required, contact us on:

- US (and territories)please call 800-818-7243
- Europe (and territories) please call +44(0)207 324 8500

\*

\*


- New User?
- Request new password
- Create a new account

Author:

Stephanie Jirard

Pub date:

January 2019

Buy the book

Order Review Copy

© 2023 **Sage Publications Sage Publications India Pvt. Ltd.**

Terms of Service •   Copyright Notice •  Privacy PolicyPrivacy Policy

### Browser not supported

You are using a browser version that is no longer supported by this website and could result in a less-than-optimal experience.

To ensure full site functionality, please use an alternative web browser or upgrade your version of Internet Explorer.
